# Supplementary material for: Genomic Profiling Reveals Novel Predictive Biomarkers for Chemo-Radiotherapy Efficacy and Thoracic Toxicity in Non-Small-Cell Lung Cancer
Source: PubMed Central journal article supplement (PMC9329611; doi:10.3389/fonc.2022.928605), 2022-07-14
Supplement: Image_1.pdf [file Image_1.pdf]

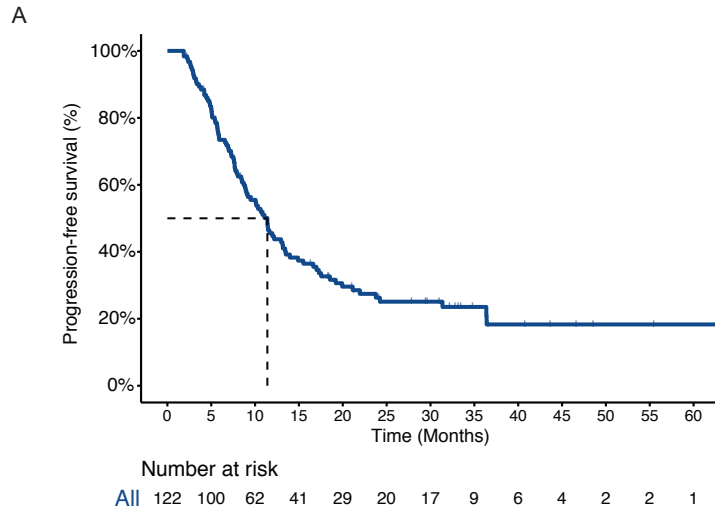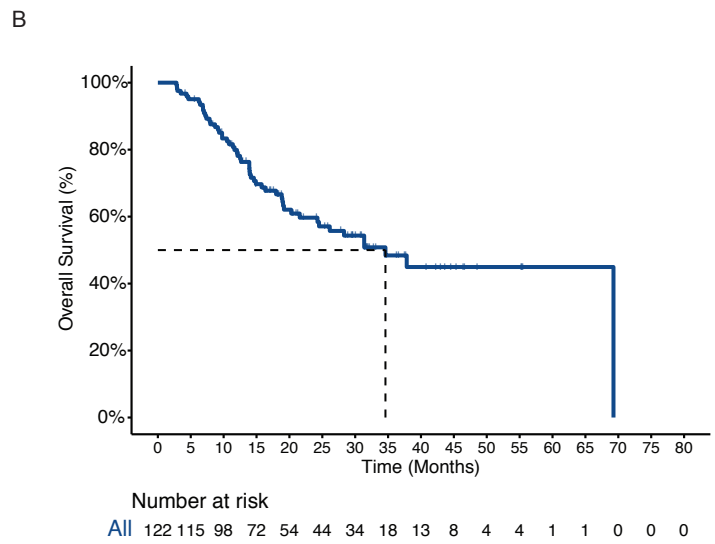

**Supplementary Figure 1. Survival outcomes of the entire cohort.** (A and B) Kaplan-Meier estimates of (A) PFS and (B) OS in the full analysis.
