# Supplementary material for: Genomic Profiling Reveals Novel Predictive Biomarkers for Chemo-Radiotherapy Efficacy and Thoracic Toxicity in Non-Small-Cell Lung Cancer
Source: PubMed Central journal article supplement (PMC9329611; doi:10.3389/fonc.2022.928605), 2022-07-14
Supplement: Image_2.pdf [file Image_2.pdf]

A

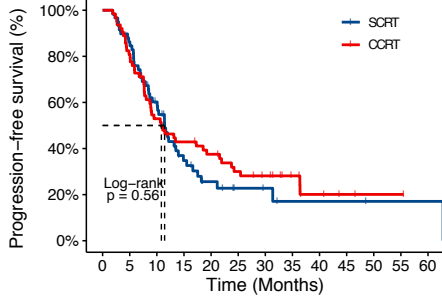

Number at risk

|      |    |    |    |    |    |    |    |   |   |   |   |   |   |
|------|----|----|----|----|----|----|----|---|---|---|---|---|---|
| SCRT | 59 | 50 | 33 | 16 | 9  | 5  | 4  | 2 | 2 | 2 | 1 | 1 | 1 |
| CCRT | 63 | 50 | 32 | 25 | 21 | 16 | 13 | 8 | 4 | 2 | 1 | 1 | 0 |

B

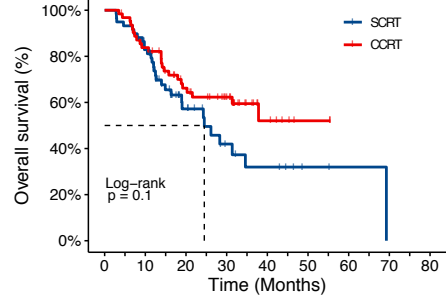

Number at risk

|      |    |    |    |    |   |   |   |   |   |
|------|----|----|----|----|---|---|---|---|---|
| SCRT | 59 | 47 | 19 | 9  | 6 | 2 | 1 | 0 | 0 |
| CCRT | 63 | 51 | 35 | 25 | 7 | 2 | 0 | 0 | 0 |

C

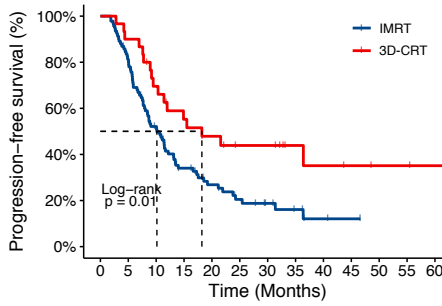

Number at risk

|        |    |    |    |    |    |    |   |   |   |   |   |   |   |
|--------|----|----|----|----|----|----|---|---|---|---|---|---|---|
| IMRT   | 92 | 73 | 45 | 26 | 18 | 12 | 8 | 5 | 2 | 1 | 0 | 0 | 0 |
| 3D-CRT | 30 | 27 | 20 | 15 | 12 | 9  | 5 | 4 | 3 | 2 | 2 | 1 | 0 |

D

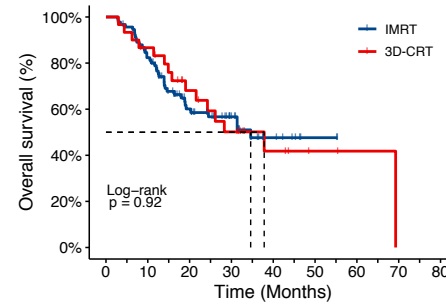

Number at risk

|        |    |    |    |    |   |   |   |   |   |
|--------|----|----|----|----|---|---|---|---|---|
| IMRT   | 92 | 73 | 38 | 23 | 8 | 2 | 0 | 0 | 0 |
| 3D-CRT | 30 | 25 | 16 | 11 | 5 | 2 | 1 | 0 | 0 |

E

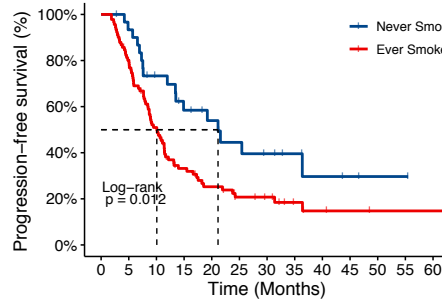

Number at risk

|              |    |    |    |    |    |    |    |   |   |   |   |   |   |
|--------------|----|----|----|----|----|----|----|---|---|---|---|---|---|
| Never Smoker | 31 | 28 | 20 | 15 | 12 | 9  | 7  | 5 | 3 | 2 | 1 | 1 | 0 |
| Ever Smoker  | 91 | 72 | 45 | 26 | 18 | 12 | 10 | 5 | 3 | 2 | 1 | 1 | 1 |

F

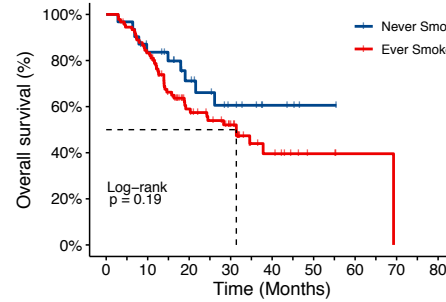

Number at risk

|              |    |    |    |    |   |   |   |   |   |
|--------------|----|----|----|----|---|---|---|---|---|
| Never Smoker | 31 | 24 | 16 | 9  | 4 | 1 | 0 | 0 | 0 |
| Ever Smoker  | 91 | 74 | 38 | 25 | 9 | 3 | 1 | 0 | 0 |

G

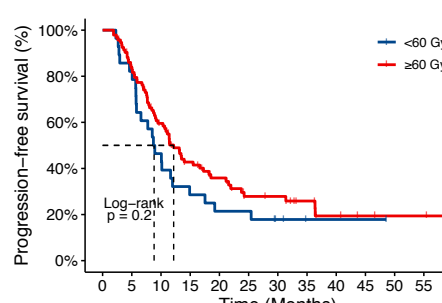

Number at risk

|        |    |    |    |    |    |    |    |   |   |   |   |   |
|--------|----|----|----|----|----|----|----|---|---|---|---|---|
| <60 Gy | 28 | 23 | 13 | 8  | 6  | 3  | 1  | 1 | 1 | 0 | 0 | 0 |
| ≥60 Gy | 94 | 77 | 52 | 33 | 24 | 15 | 14 | 9 | 5 | 3 | 2 | 1 |

H

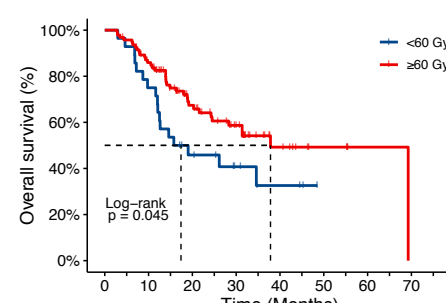

Number at risk

|        |    |    |    |    |    |   |   |   |   |
|--------|----|----|----|----|----|---|---|---|---|
| <60 Gy | 28 | 21 | 11 | 6  | 3  | 0 | 0 | 0 | 0 |
| ≥60 Gy | 94 | 77 | 43 | 28 | 10 | 4 | 1 | 0 | 0 |

**Supplementary Figure 2. Clinical correlates of dCRT survival in NSCLC.** (A and B) Kaplan-Meier estimates of (A) PFS and (B) OS in the full analysis set comparing patients treated with concurrent vs. sequential CRT. (C and D) Kaplan-Meier estimates of (C) PFS and (D) OS in the full analysis set comparing patients treated with 3D-CRT vs. IMRT. (E and F) Kaplan-Meier estimates of (E) PFS and (F) OS in the full analysis set comparing patients with and without smoking histories. (G and H) Kaplan-Meier estimates of (G) PFS and (H) OS in the full analysis set comparing patients treated with different RT doses. HR, hazard ratio; CI, confidence interval. Tick marks indicate censored data.
